# Supplementary material
Source: PubMed Central journal article supplement (PMC3146728)
Supplement: mmc1.pdf [file mmc1.pdf]

**Supplemental Data**

**American Journal of Human Genetics, Volume 88**

**Human Mutations in the Nuclear Distribution E**

**Homolog 1 Cause Extreme Microcephaly**

**with Lissencephaly (Microlissencephaly)**

**Fowzan S. Alkuraya, Xuyu Cai, Carina Emery, Ganeshwaran H. Mochida, Mohammed S. Al-Dosari, Jillian M. Felie, R. Sean Hill, Brenda J. Barry, Jennifer N. Partlow, Generoso G. Gascon, Amal Kentab, Mohammad Jan, Ranad Shaheen, Yuanyi Feng, and Christopher A. Walsh**

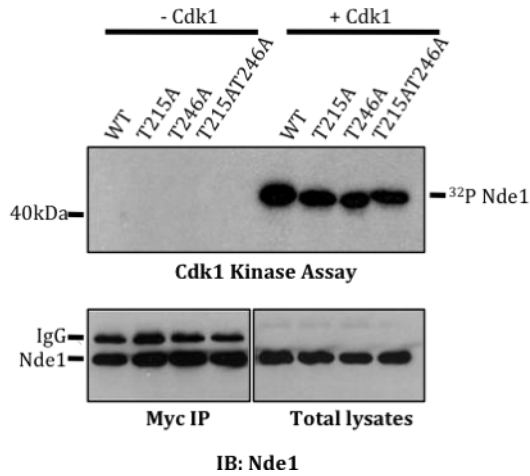

**Figure S1. Kinase Assay of Myc-Nde1 by Cdk1/Cyclin B**

Wild-type Myc-Nde1 and three phospho-deficient mutants (T215A, T246A, T215AT246A) were transiently expressed in 293T cells and immunoprecipitated with anti-Myc antibody. Immuno-purified Myc-Nde1 proteins were subjected to kinase assay with recombinant Cdk1 and cyclin B.  $^{32}\text{P}$  signals at the approximate molecular weight of Nde1 protein were detectable in all four conditions, but were significantly reduced in T215A, T246A, T215AT246A phospho-deficient mutants compared to the wild-type.

**Table S1. Sequencing Primers Used in the Identification of Human *NDE1* Mutations in Microlissencephaly Patients**

| EXON | FORWARD                   | REVERSE              |
|------|---------------------------|----------------------|
| E2   | TTTTCTGTAAAGGGGATCAGC     | AGGAAAAGCAGGTGAACTCG |
| E3   | GAGACTCTGTCTTCAAAAATATTAC | CATGCCATGCCTGTGTTG   |
| E4   | TGCTACTGTGTCTAGCCTTCTCA   | GAGTCTCCCACTCGTGCTTT |
| E5   | GTCTGACCCTTCGCACCTC       | GAGCTTGTGGGACAAGATGT |
| E6   | GCCTGGCTGAGGACTTGAAT      | ACCCACCCAGATTCTTACC  |
| E7   | GCGATGTAAACGCACAGACA      | AGATCAACCCCTTCACACA  |
| E8   | TGTACAGGCTCTGGTAAGACAGA   | CTGGGGGTGAGTGTCTCTTG |
| E9   | AGCCACGCGTCATACTCTG       | AGGAGATCGAGAACCTCACC |

**Table S2. Microcephaly Collaborative Members**

| Member                          | Institution                                                                               |
|---------------------------------|-------------------------------------------------------------------------------------------|
| Abdulsalam Abu-Libdeh           | Makassed Islamic Charitable Hospital, Jerusalem, Israel                                   |
| Dianne Abuelo                   | Rhode Island Hospital, USA                                                                |
| Lesley Ades                     | The Children's Hospital at Westmead, Australia                                            |
| Sirpa Ala-Mello                 | Helsinki University Central Hospital, Finland                                             |
| Sadika A. Al-Awadi              | Kuwait Medical Genetics Centre, Kuwait                                                    |
| Lihadh Al-Gazali                | United Arab Emirates University, United Arab Emirates                                     |
| Isphana Al Khatib               | Al Noor Training Centre for Children with Special Needs,<br>United Arab Emirates          |
| Kerry Baldwin Jedele            | Gundersen Lutheran Medical Center, USA                                                    |
| A. James Barkovich              | University of California, San Francisco, USA                                              |
| Lina Basel-Vanagaite            | Rabin Medical Center, Israel                                                              |
| Laila Bastaki                   | Kuwait Medical Genetics Centre, Kuwait                                                    |
| Tawfeg Ben-Omran                | Weill Cornell Medical College, Hamad Medical<br>Corporation, Qatar                        |
| Habiba Chaabouni                | Charles Nicolle Hospital, Tunisia                                                         |
| Azhar Daoud                     | Jordan University of Science and Technology, King<br>Abdullah University Hospital, Jordan |
| Stefano D'Arrigo                | Fondazione IRCCS Istituto Neurologico Carlo Besta, Italy                                  |
| Adre J. du Plessis              | Children's National Medical Center, USA                                                   |
| William B. Dobyns               | Seattle Children's Research Institute, University of<br>Washington, USA                   |
| Wafaa Eyaid                     | King Fahad National Guard Hospital, Kingdom of Saudi<br>Arabia                            |
| Art Grix                        | Kaiser Permanente, USA                                                                    |
| Mary Haddadin                   | Quest Diagnostics, USA                                                                    |
| Fuki M. Hisama                  | University of Washington, USA                                                             |
| Mira Irons                      | Children's Hospital Boston, USA                                                           |
| James Irvine                    | University of Saskatchewan, Canada                                                        |
| Rachel Kelleher                 | Rhode Island Hospital, USA                                                                |
| Samir Khalil                    | Makassed Islamic Charitable Hospital, Al-Quds<br>University, Jerusalem, Israel            |
| Virginia Kimonis                | University of California Irvine School of Medicine, USA                                   |
| Edwin Kolodny                   | New York University School of Medicine, USA                                               |
| Edmond Lemire                   | Royal University Hospital, University of Saskatchewan,<br>Canada                          |
| Dorit Lev                       | Wolfson Medical Center, Israel                                                            |
| Rick Leventer                   | Royal Children's Hospital, Australia                                                      |
| Jennifer Lewis                  | Foundation for Children with Microcephaly, USA                                            |
| Amira Masri                     | Jordan University Hospital, The University of Jordan,<br>Jordan                           |
| Ozgur Oner                      | Dr Sami Ulus Children's Hospital, Turkey                                                  |
| Ignacio Pascual-<br>Castroviejo | University Hospital La Paz, Spain                                                         |
| Annapurna Poduri                | Brain Development and Genetics Clinic, Children's                                         |

|                      |                                                                                  |
|----------------------|----------------------------------------------------------------------------------|
| Anna Rajab           | Hospital Boston, USA                                                             |
| Miriam Regev         | Ministry of Health, Oman                                                         |
| Lucy B. Rorke-Adams  | Assaf Harofeh Medical Center, Israel                                             |
| Ayesha Saeed Husaini | Children's Hospital of Philadelphia, USA                                         |
|                      | Manzil Centre for Challenged Individuals, United Arab Emirates                   |
| Mustafa A. M. Salih  | King Khalid University Hospital, King Saud University, Kingdom of Saudi Arabia   |
| Pierre Sarda         | Arnaud de Villeneuve Hospital, France                                            |
| Swati Sathe          | New York University School of Medicine, USA                                      |
| Ingrid Scheffer      | Austin Hospital, Australia                                                       |
| Consolato Sergi      | University of Alberta Hospital, Canada; Medical University of Innsbruck, Austria |
| Ruthie Shenhav       | Rabin Medical Center, Israel                                                     |
| Elliott Sherr        | University of California at San Francisco, USA                                   |
| Janet Soul           | Children's Hospital Boston, USA                                                  |
| Joan Stoler          | Children's Hospital Boston, USA                                                  |
| Rachel Straussberg   | Tel Aviv University, Israel                                                      |
|                      | University of Szeged, Hungary                                                    |
| Ahmad Teebi          | Weill Cornell Medical College, Hamad Medical Corporation, Qatar                  |
| Meral Topcu          | Hacettepe University Faculty of Medicine, Turkey                                 |
